# Supplementary material
Source: ML conference proceedings conference paper supplement (https://openreview.net/forum?id=LBv-JtAmm4P)

# Film (SOTA=GPRGNN)

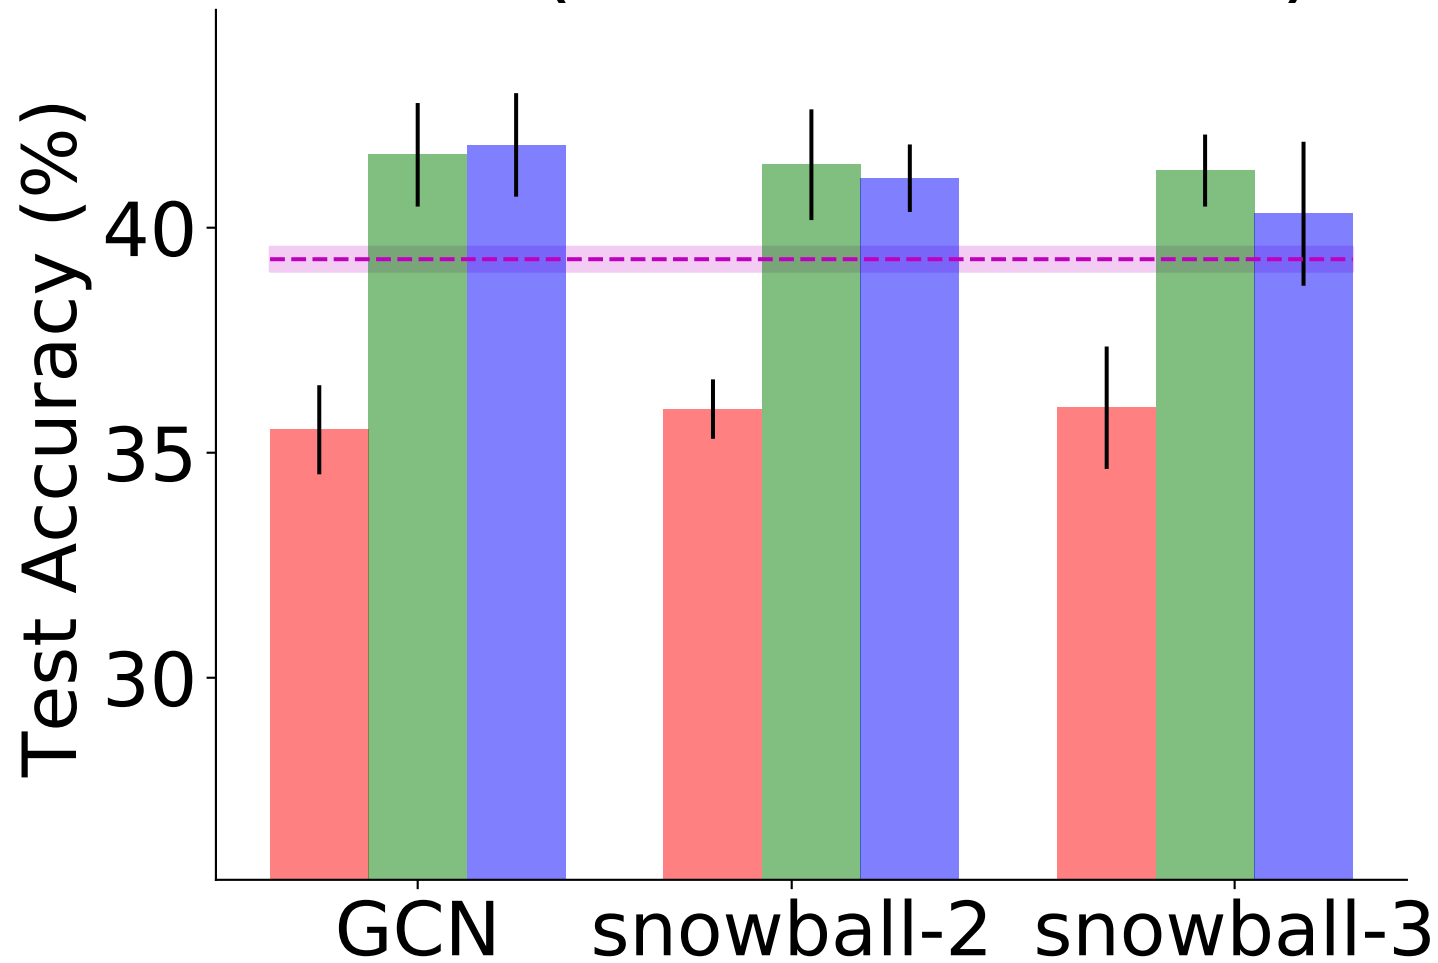

Supplement: supplementary_material [file attachment]

# Cornell (SOTA=APPNP)

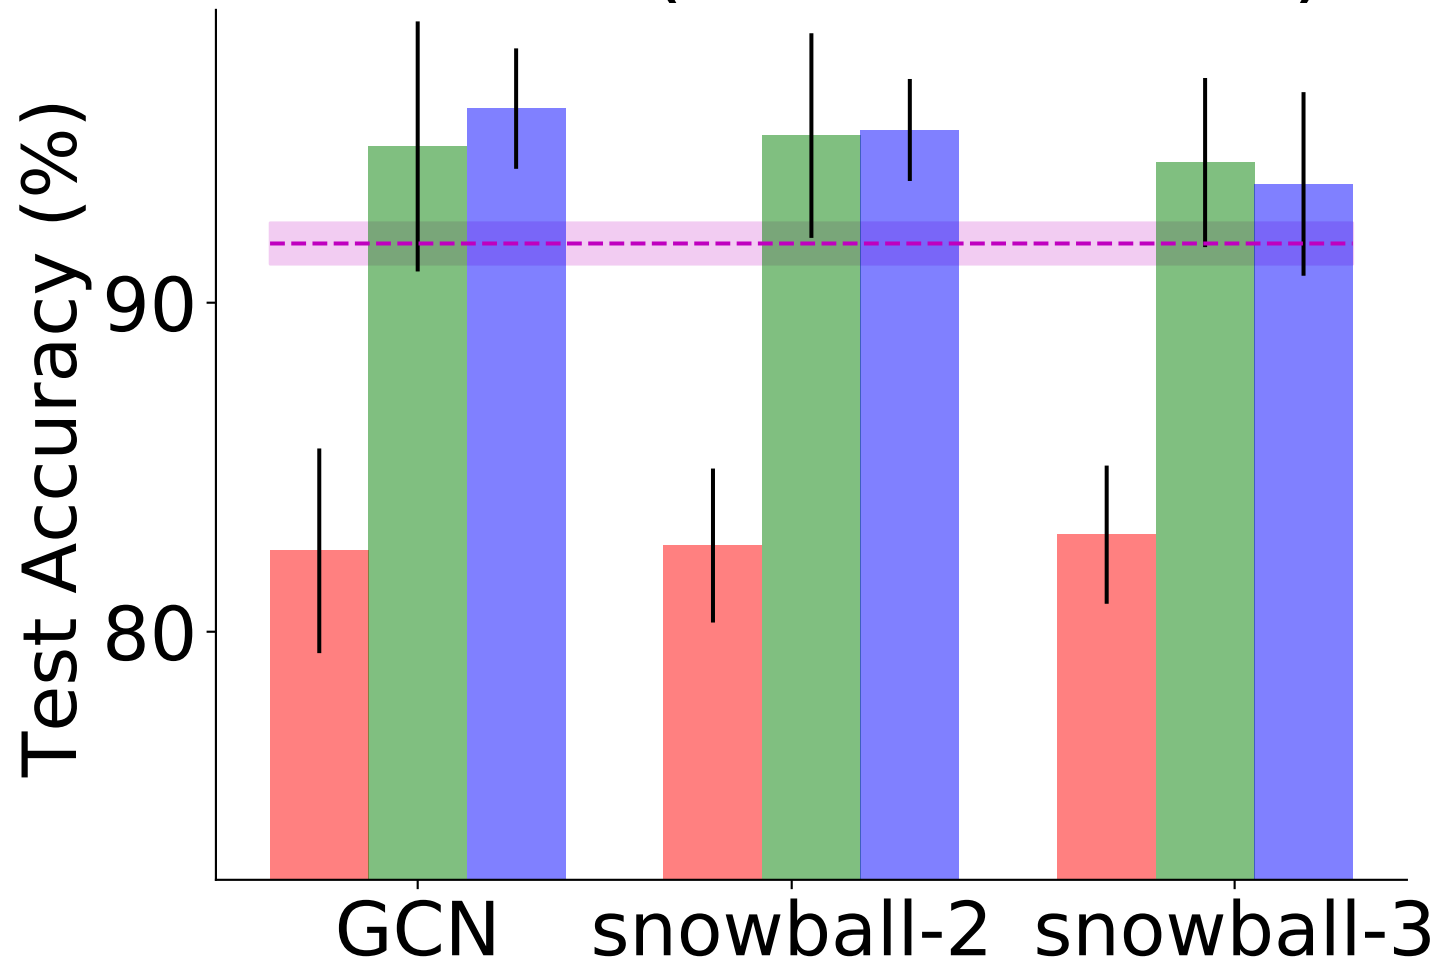

Supplement: supplementary_material [file attachment]

# Cornell (SOTA=APPNP)

Test Accuracy (%)

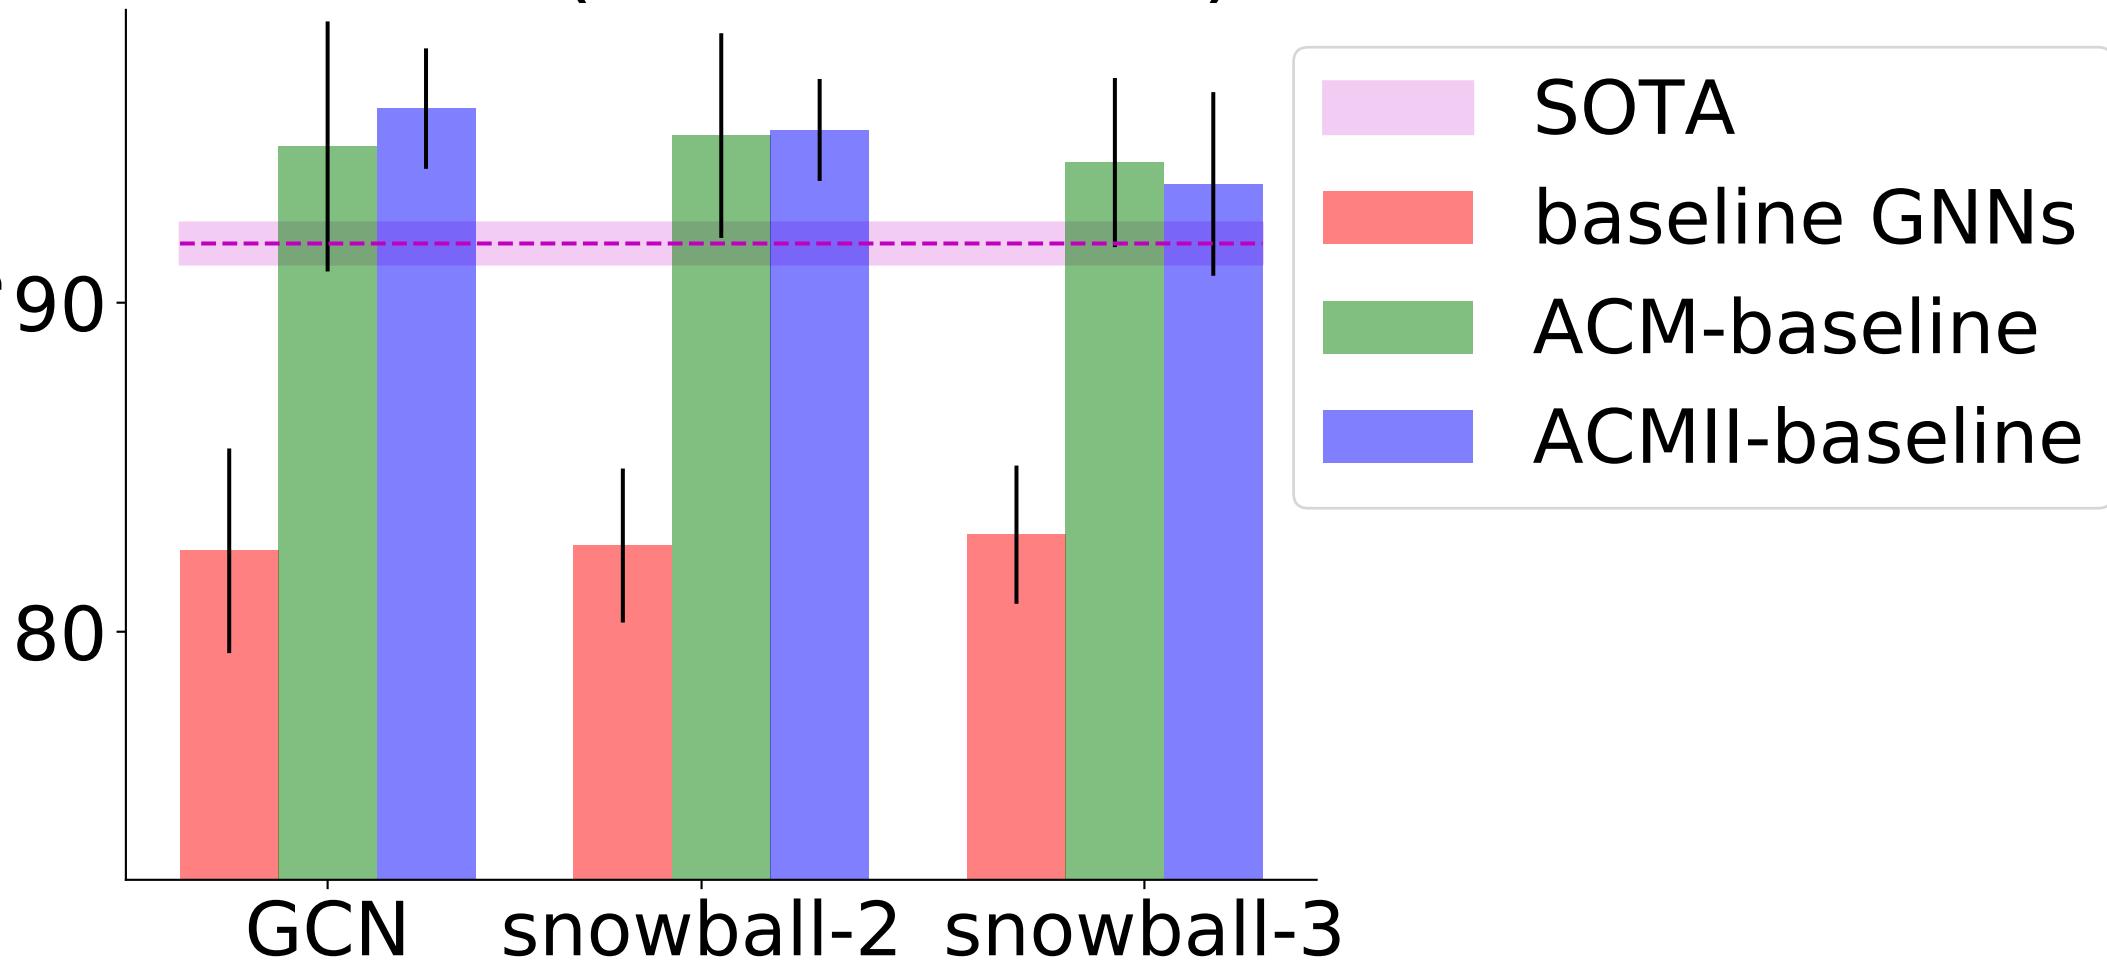

Supplement: supplementary_material [file attachment]

# Chameleon (SOTA=GAT+JK)

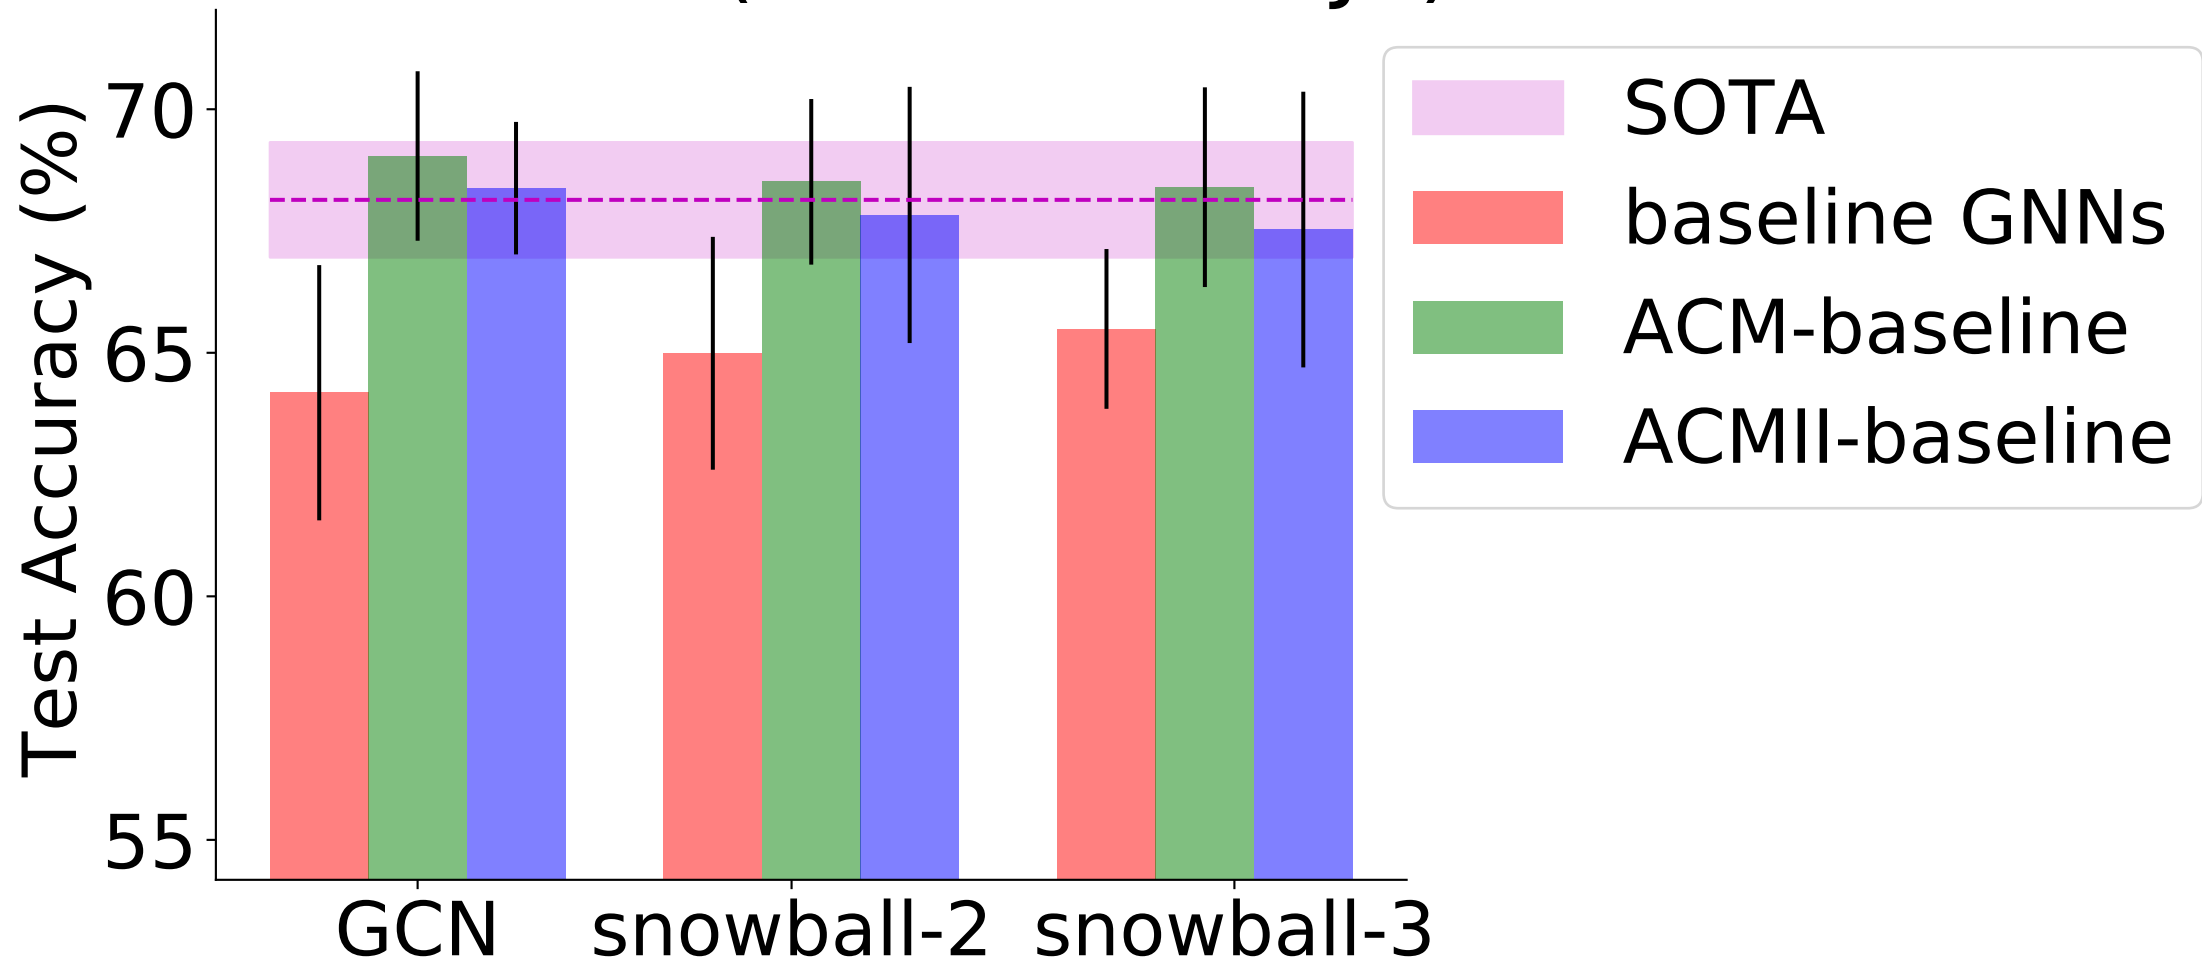

Supplement: supplementary_material [file attachment]

# Squirrel (SOTA=GCN+JK)

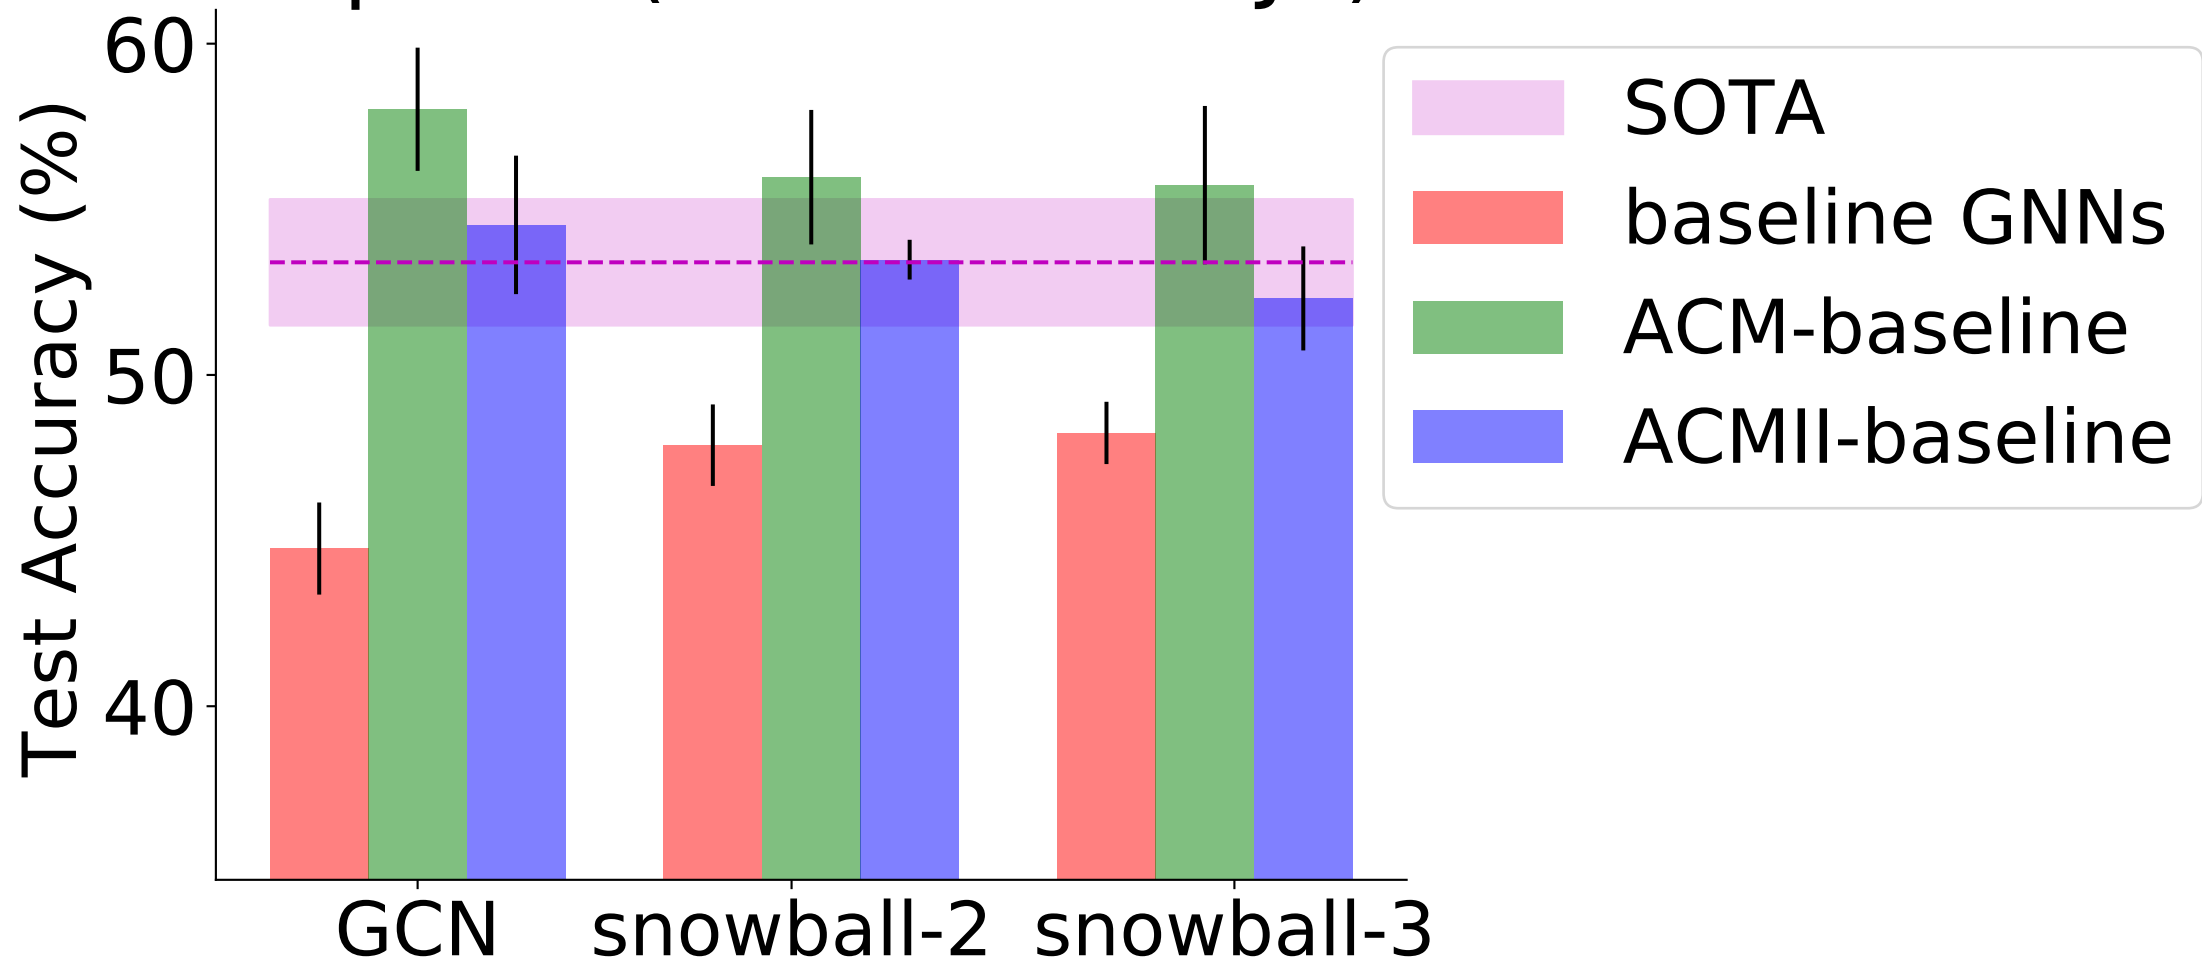

Supplement: supplementary_material [file attachment]

# Wisconsin (SOTA=MLP-2)

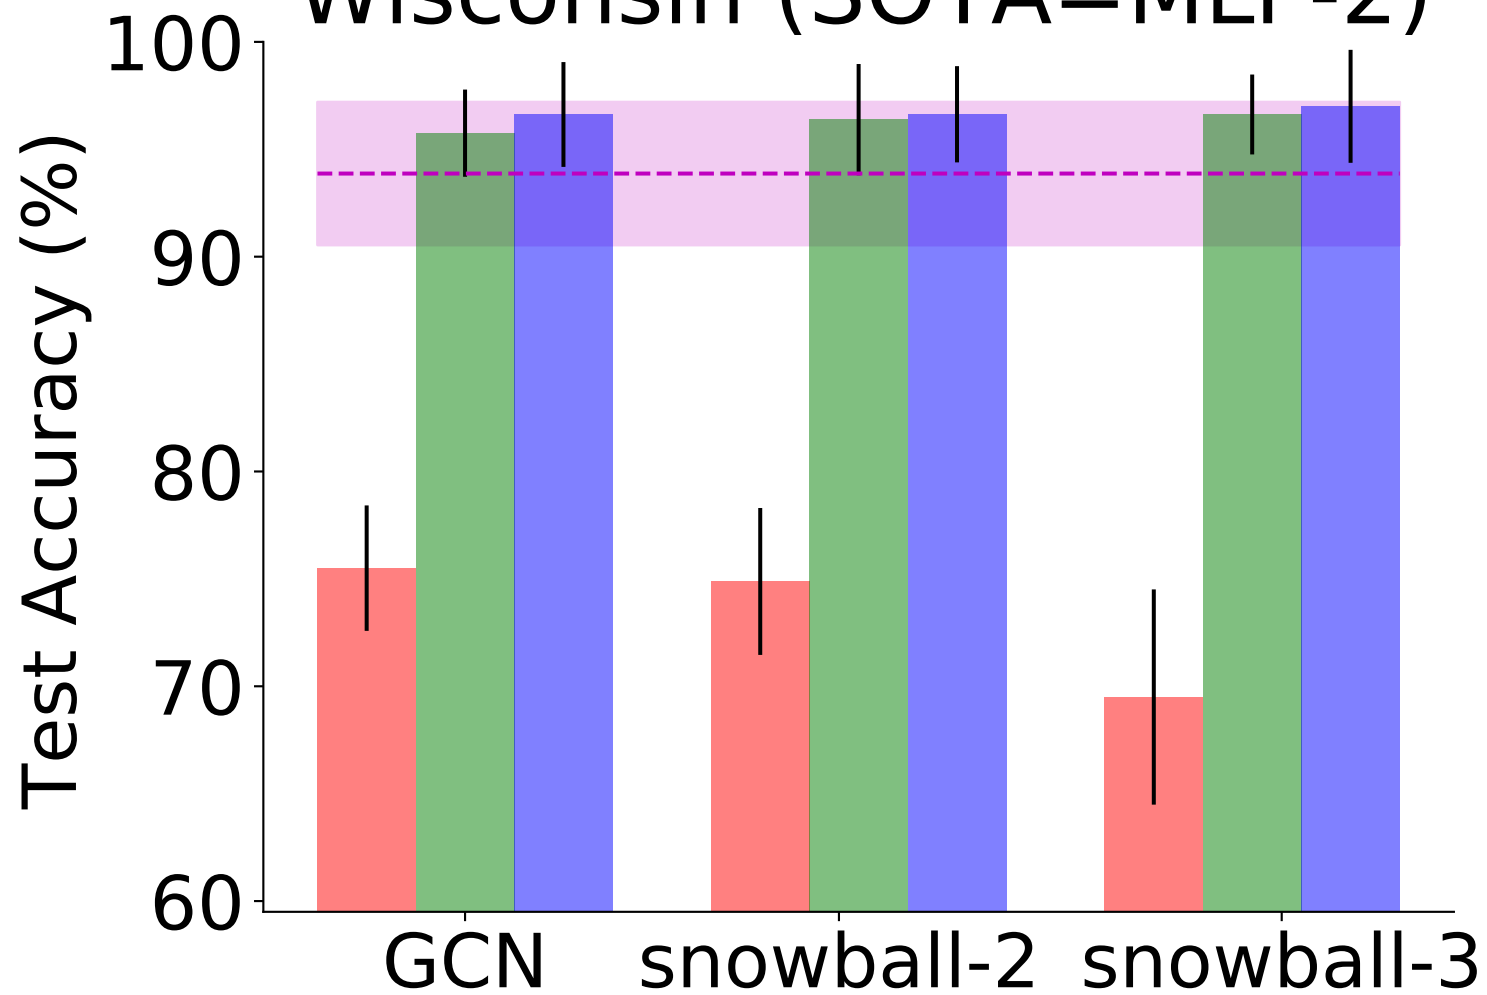

Supplement: supplementary_material [file attachment]

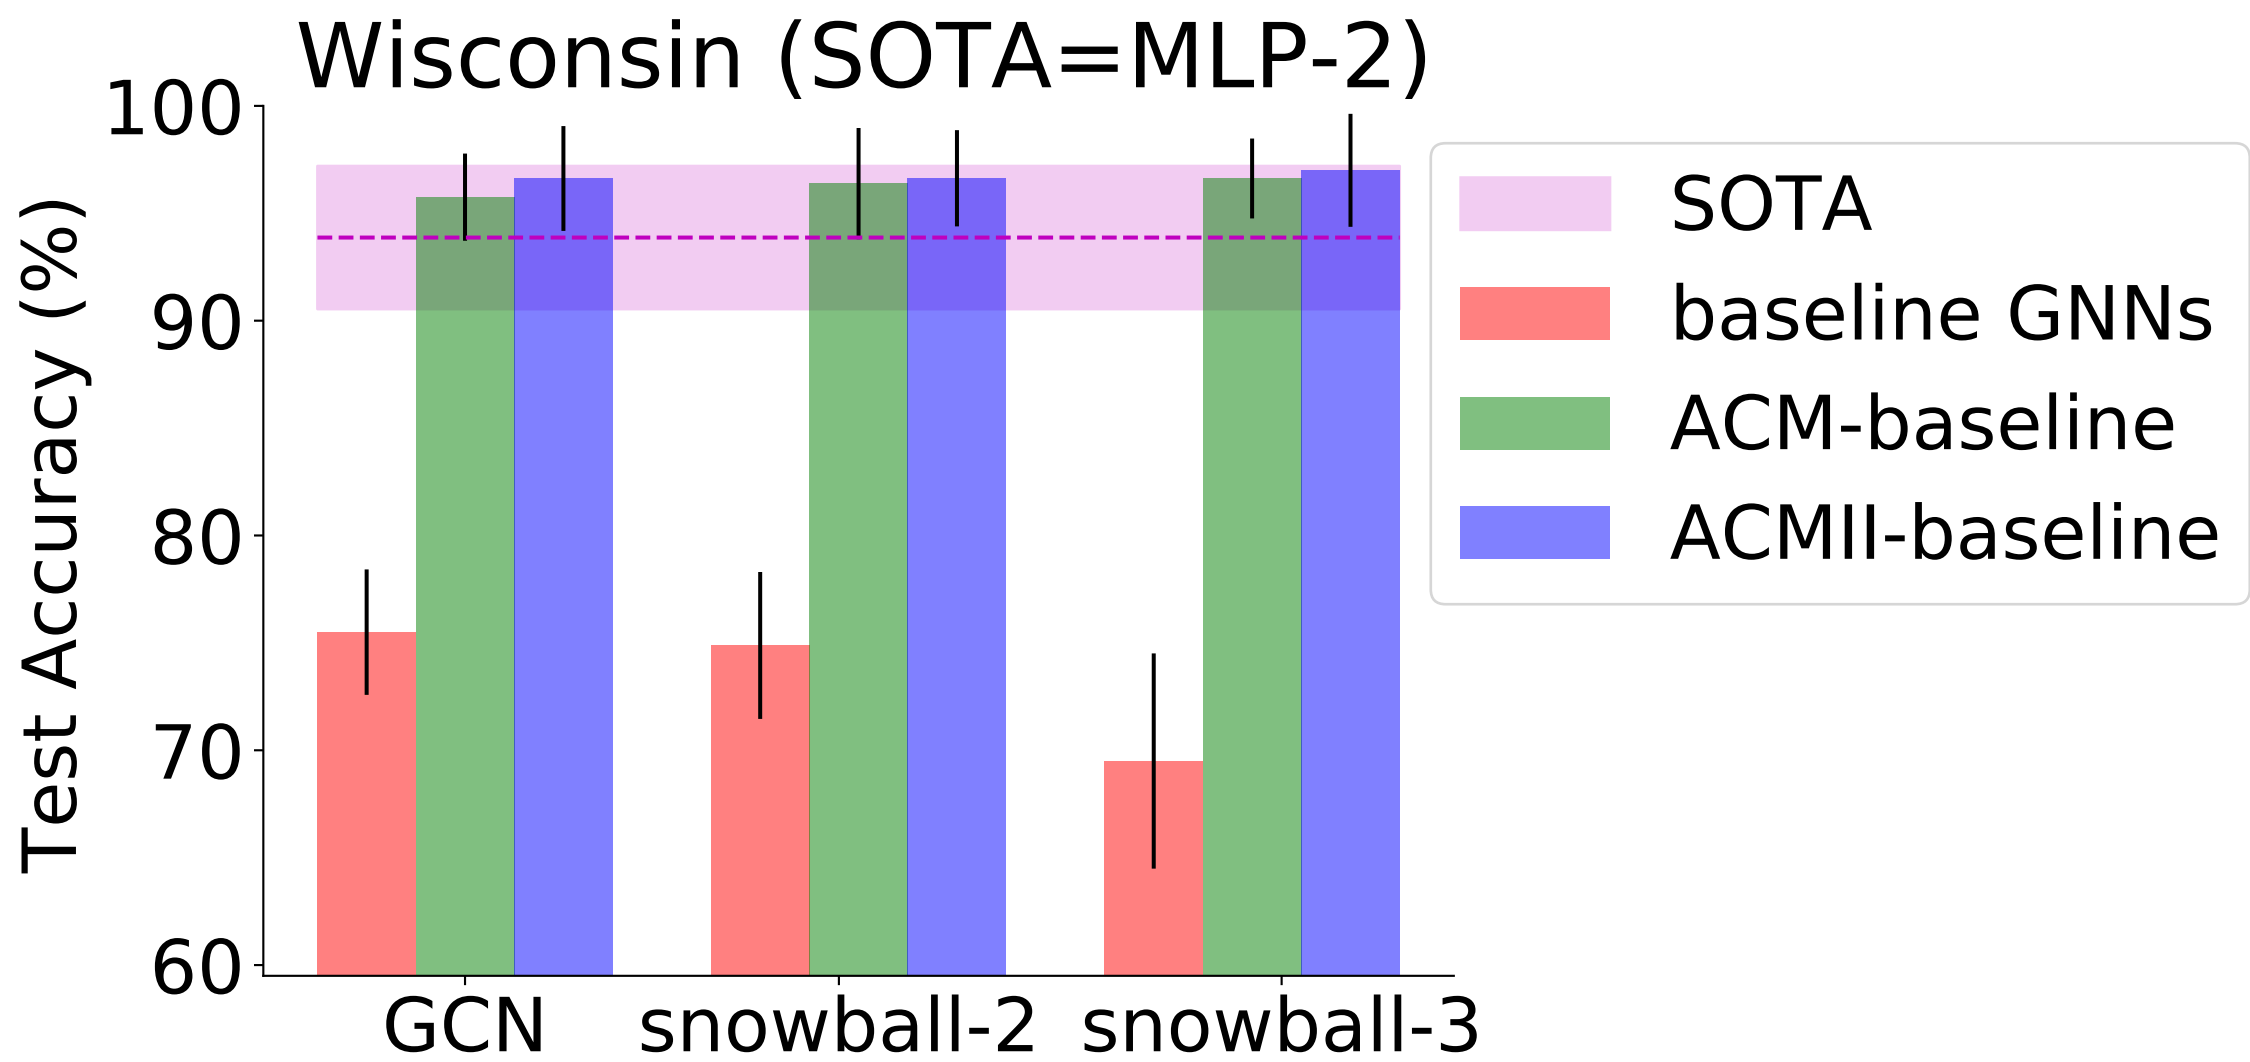

Supplement: supplementary_material [file attachment]

# Chameleon (SOTA=GAT+JK)

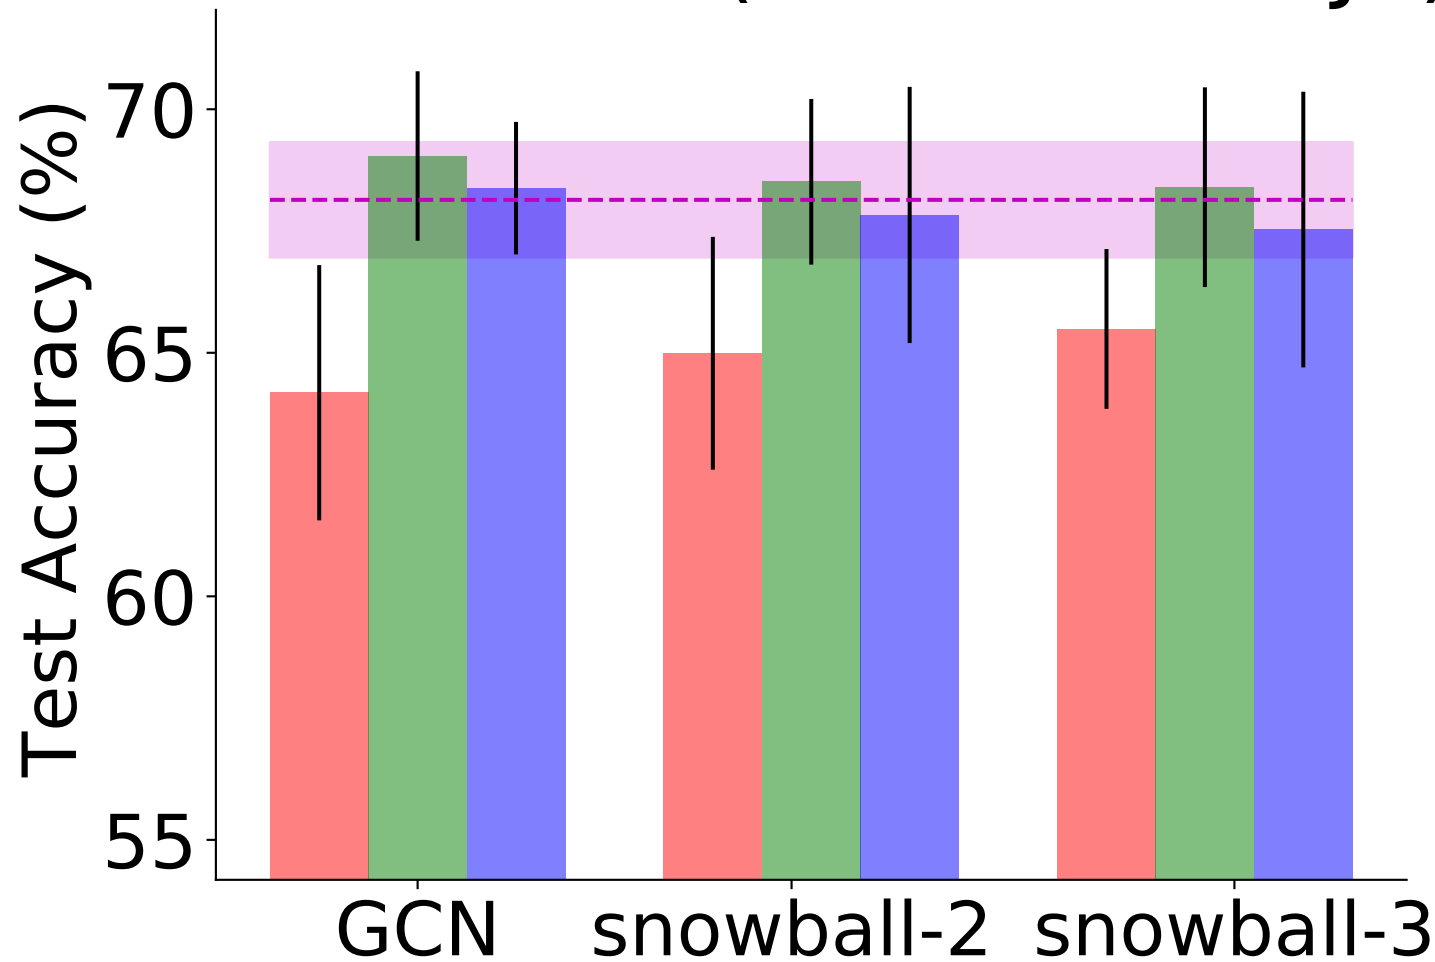

Supplement: supplementary_material [file attachment]

# Film (SOTA=GPRGNN)

Test Accuracy (%)

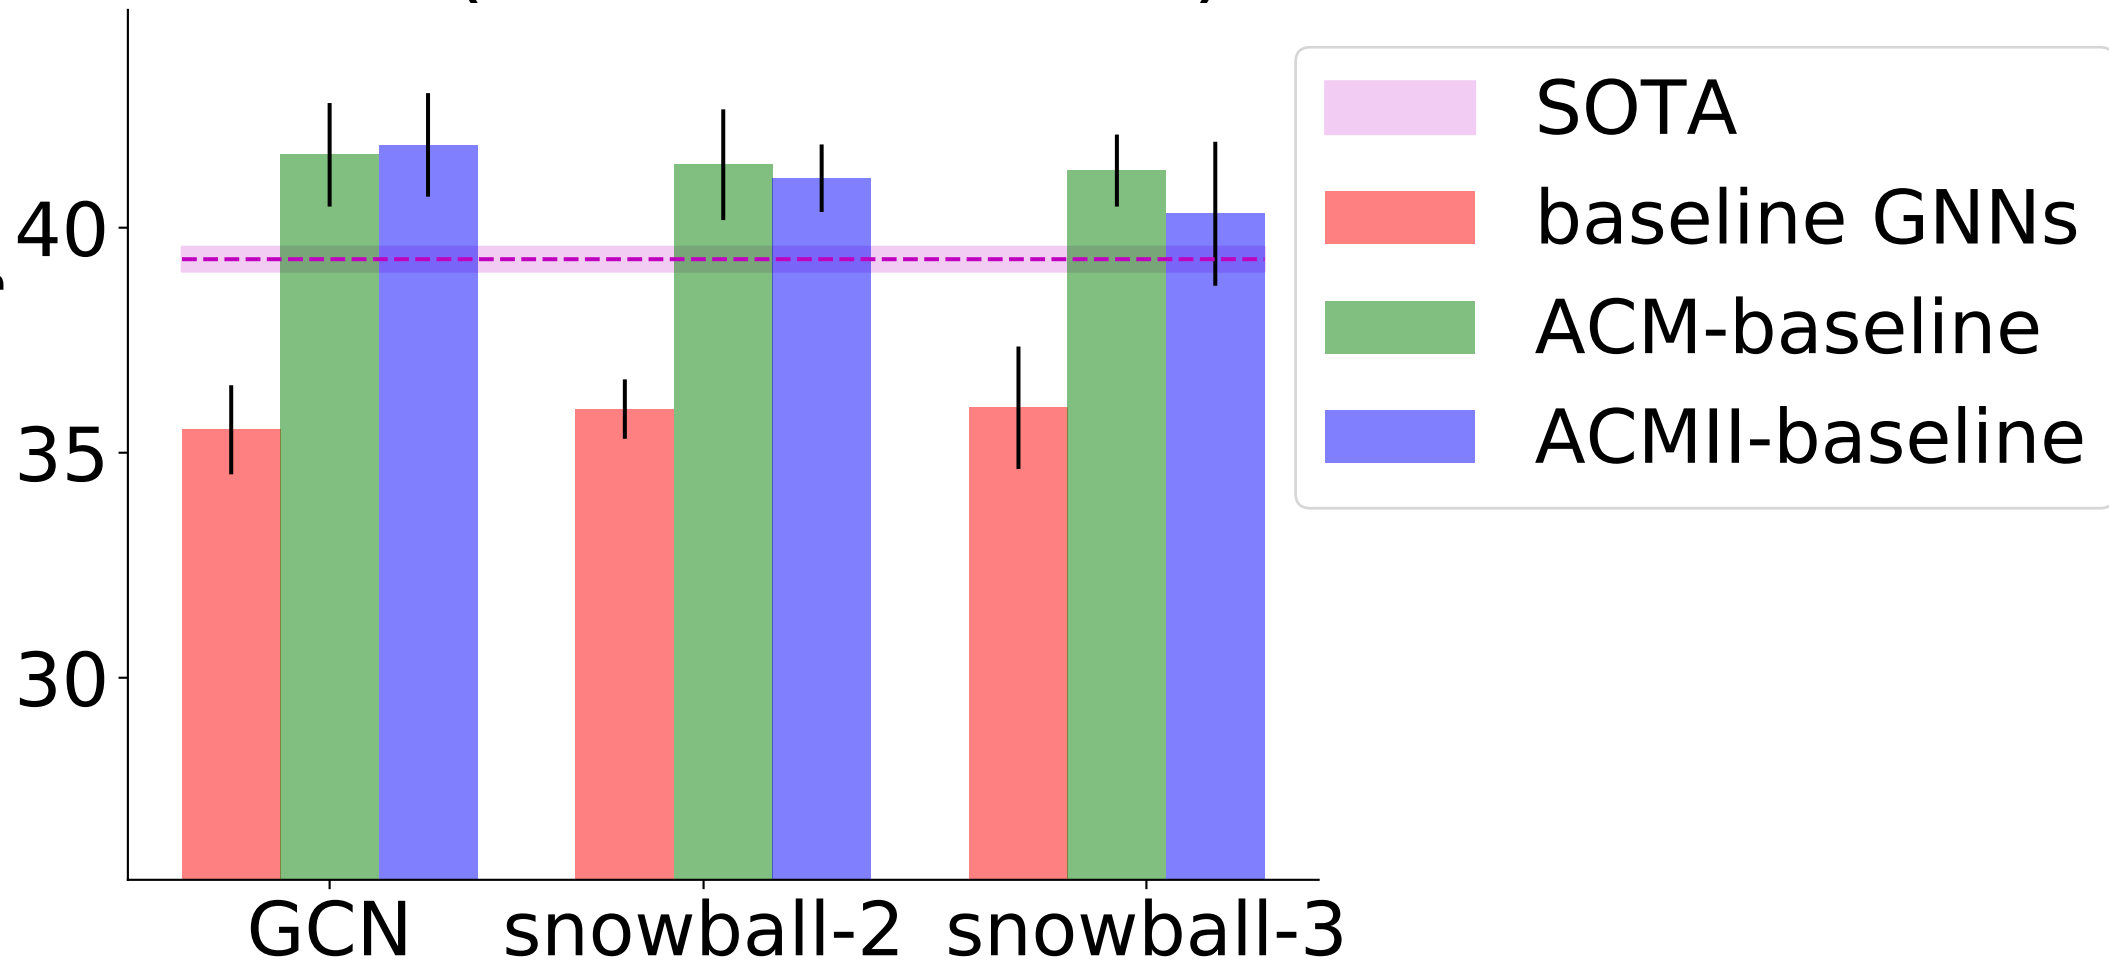

Supplement: supplementary_material [file attachment]

# Squirrel (SOTA=GCN+JK)

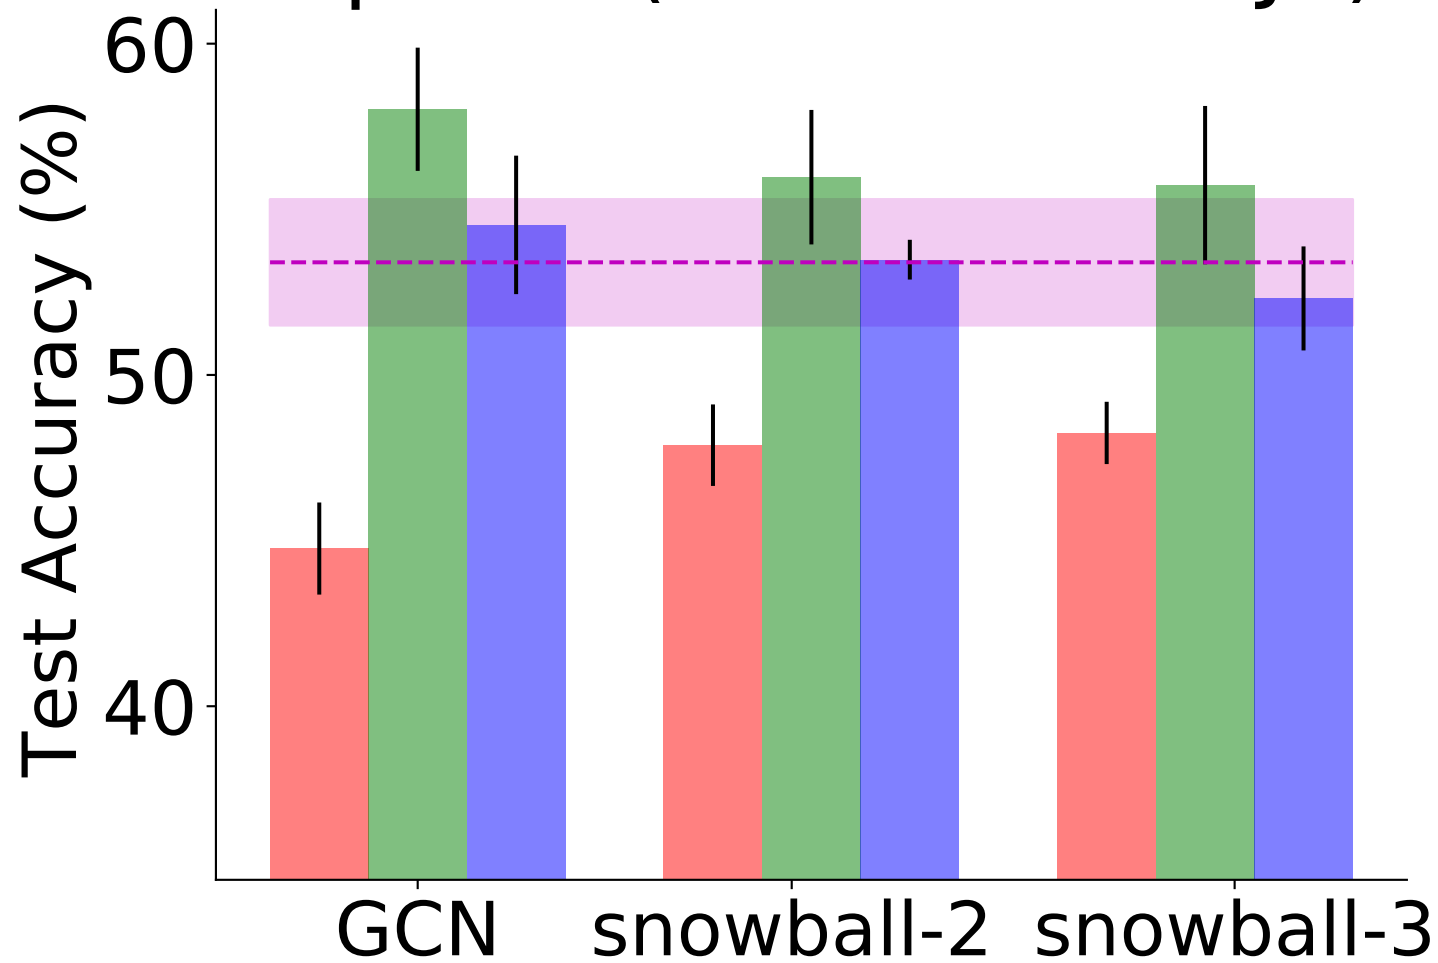

Supplement: supplementary_material [file attachment]

# Texas (SOTA=GPRGNN)

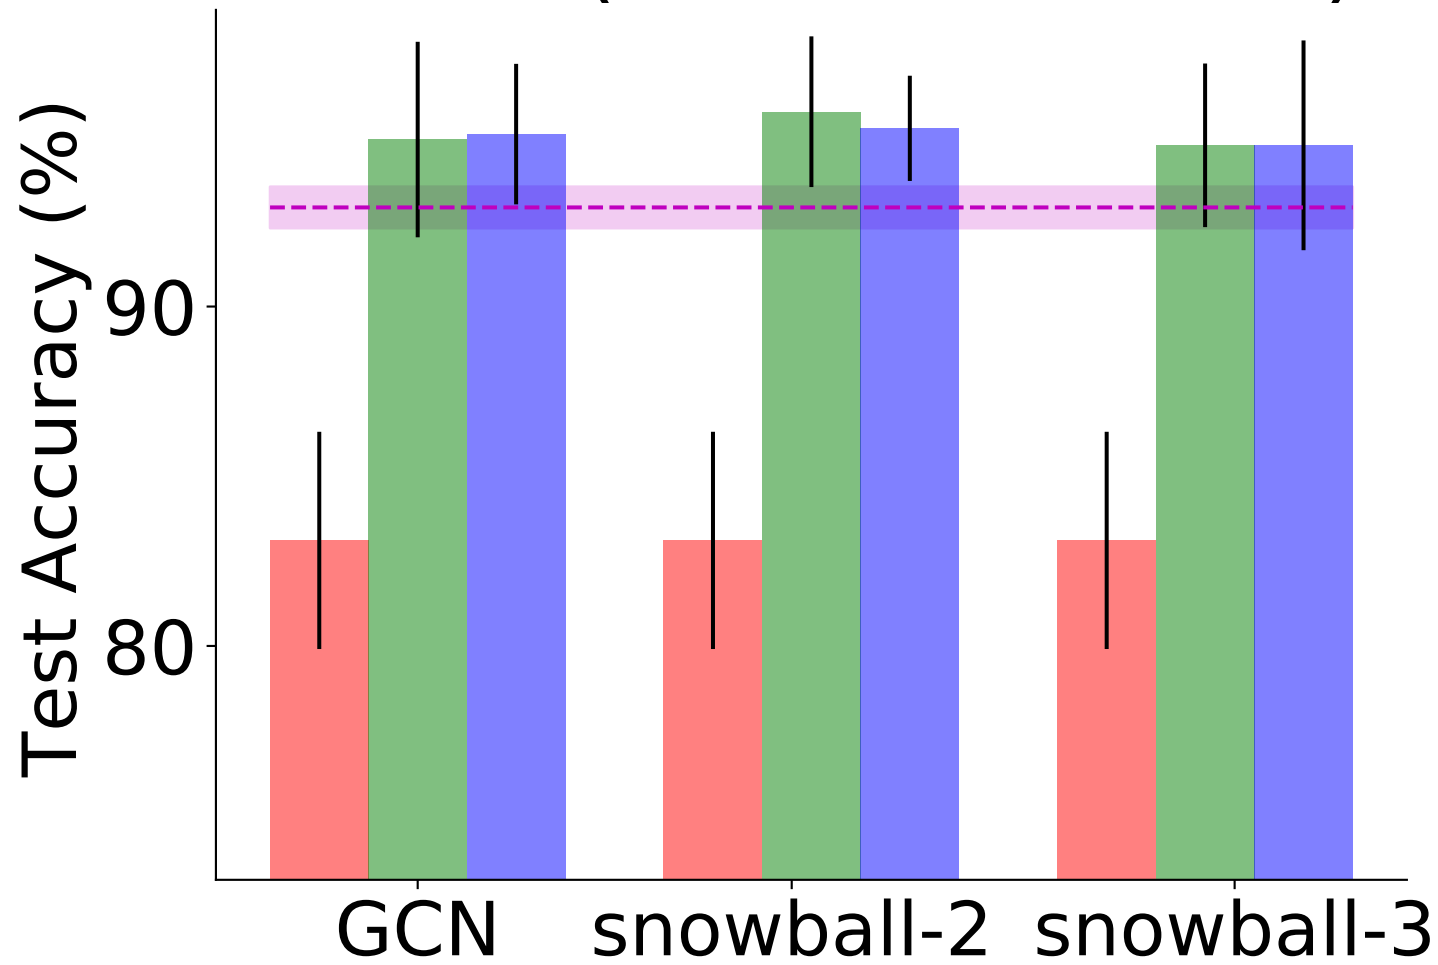

Supplement: supplementary_material [file attachment]

# Texas (SOTA=GPRGNN)

Test Accuracy (%)

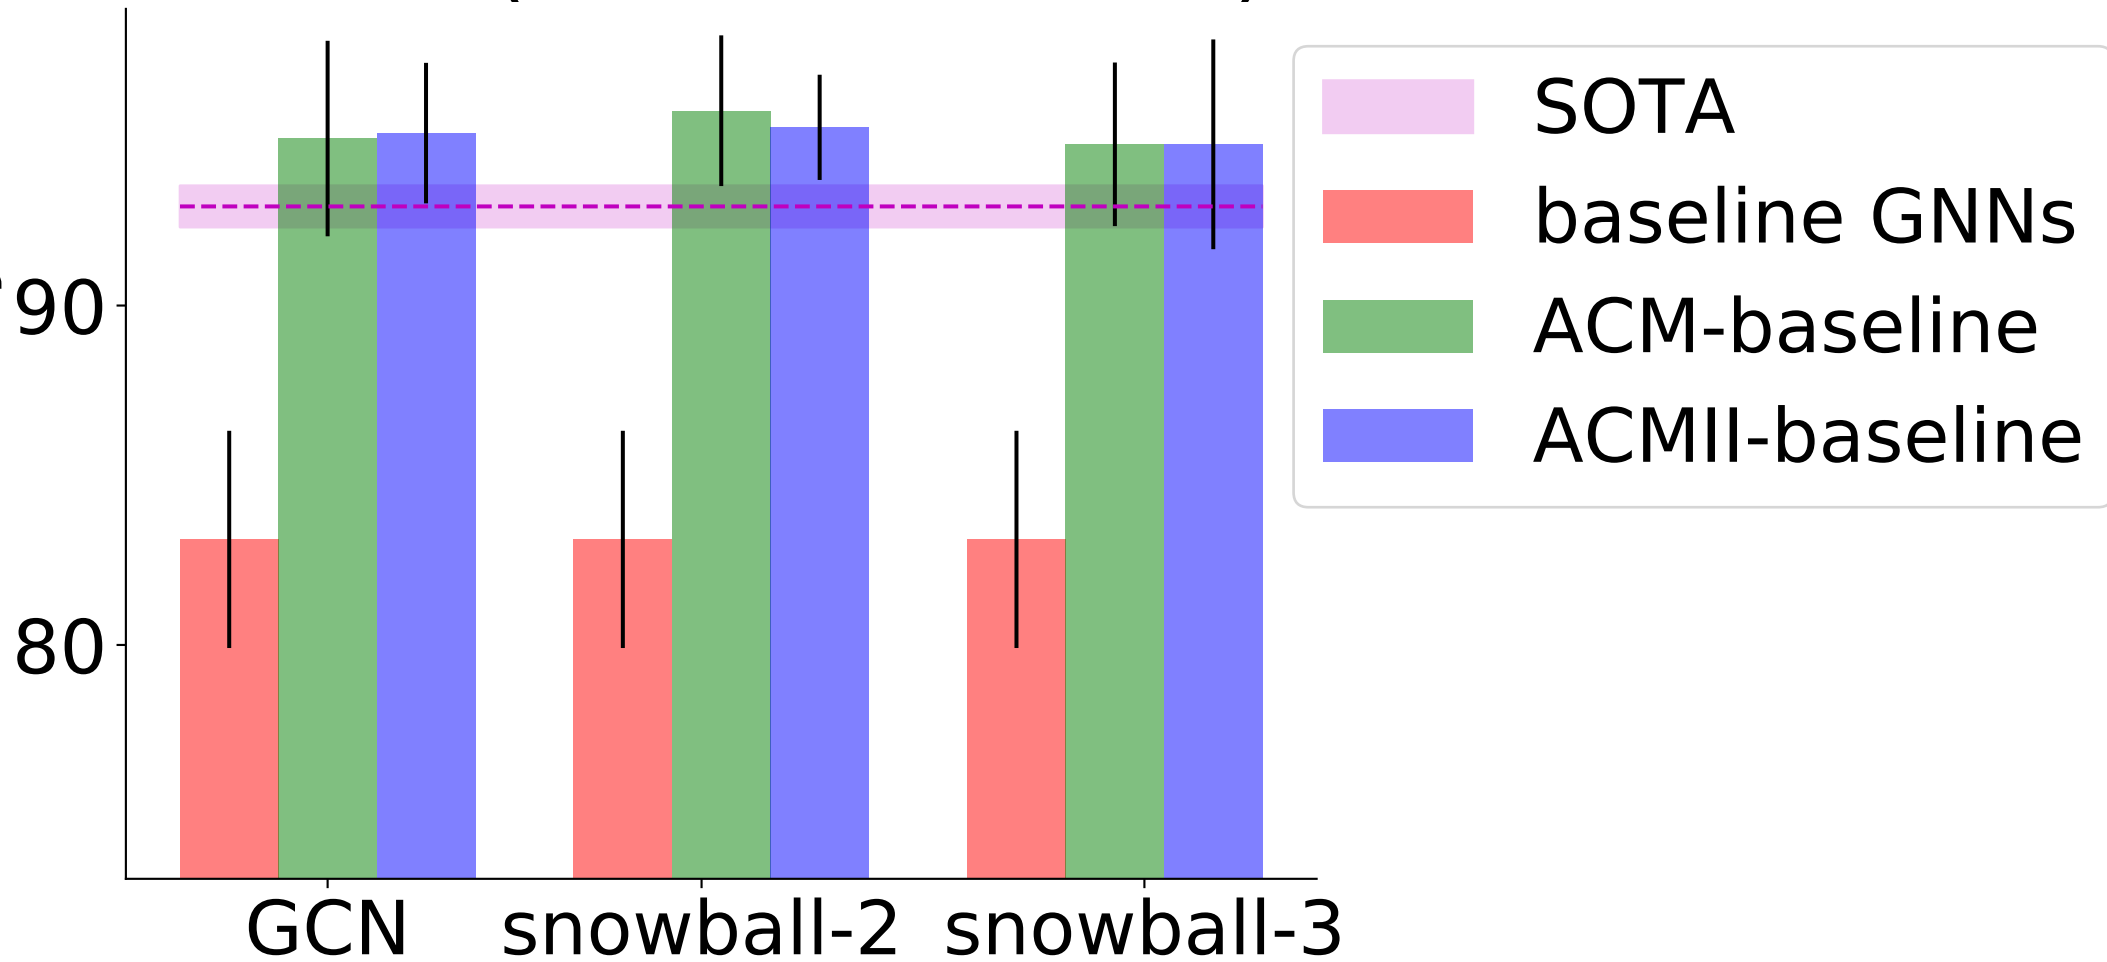

Supplement: supplementary_material [file attachment]
